# Supplementary material for: Characterisation of hexagonal birnessite with a new and rapid synthesis method—comparison with traditional synthesis
Source: Royal Society of Chemistry journal article supplement (doi:10.1039/c9ra03332g), 2019-01-01

## **Characterisation of hexagonal birnessite with a new and rapid synthesis method**

Zhangjie Qin, Xinmin Chen, Nanqi Ouyang, Shuai Lan, Guanjie Jiang, Junxia Zhang,

Qin Zhang\*

Key Laboratory of Poyang Lake Basin Agricultural Resource and Ecology of Jiangxi Province, College of Land Resource and Environment, Jiangxi Agricultural University, Nanchang 330045, China

\*Corresponding author: Tel: +86 079183813024; e-mail: chincheung@live.com

**Fig. S1** the Power XRD patterns of Bir-H<sub>2</sub>O<sub>2</sub> samples with the molar ratio of KMnO<sub>4</sub> and H<sub>2</sub>O<sub>2</sub> at 1:1.25, 1:1.50, and 1:1.75.

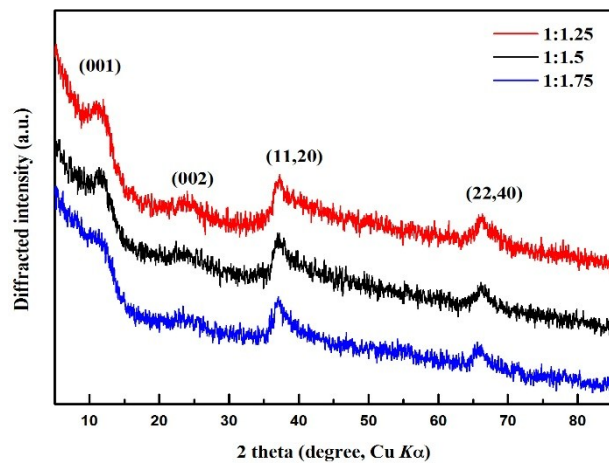

Supplement: c9ra03332g1.pdf [file c9ra03332g1.pdf]
